# Supplementary material
Source: PubMed Central journal article supplement (PMC2652381)

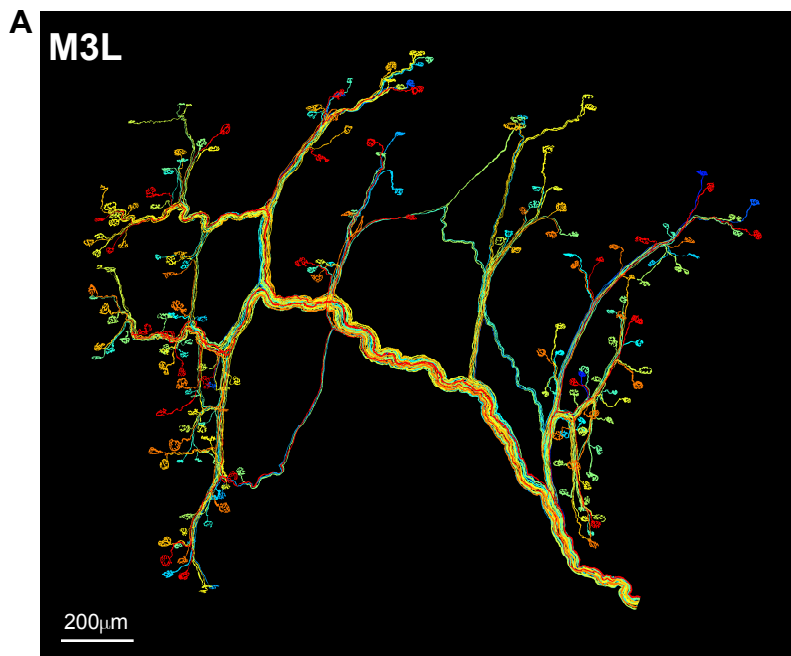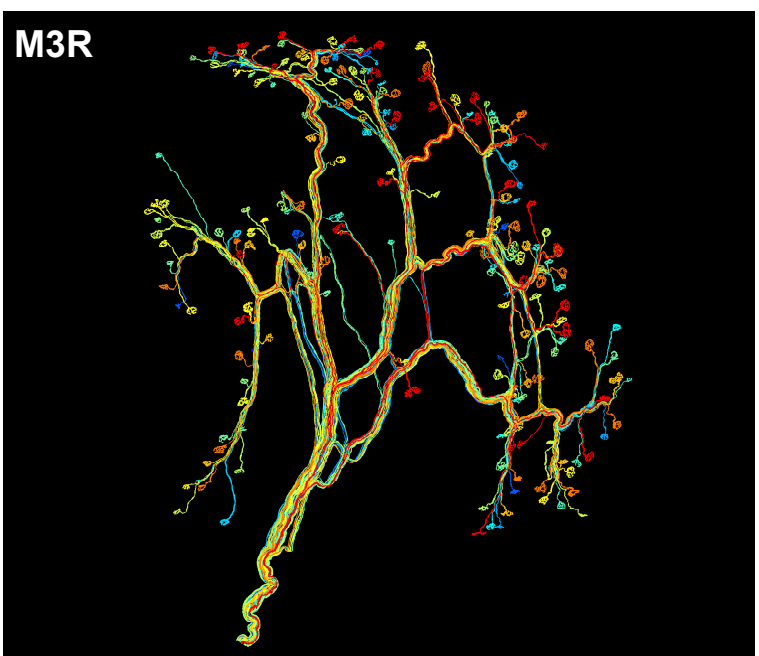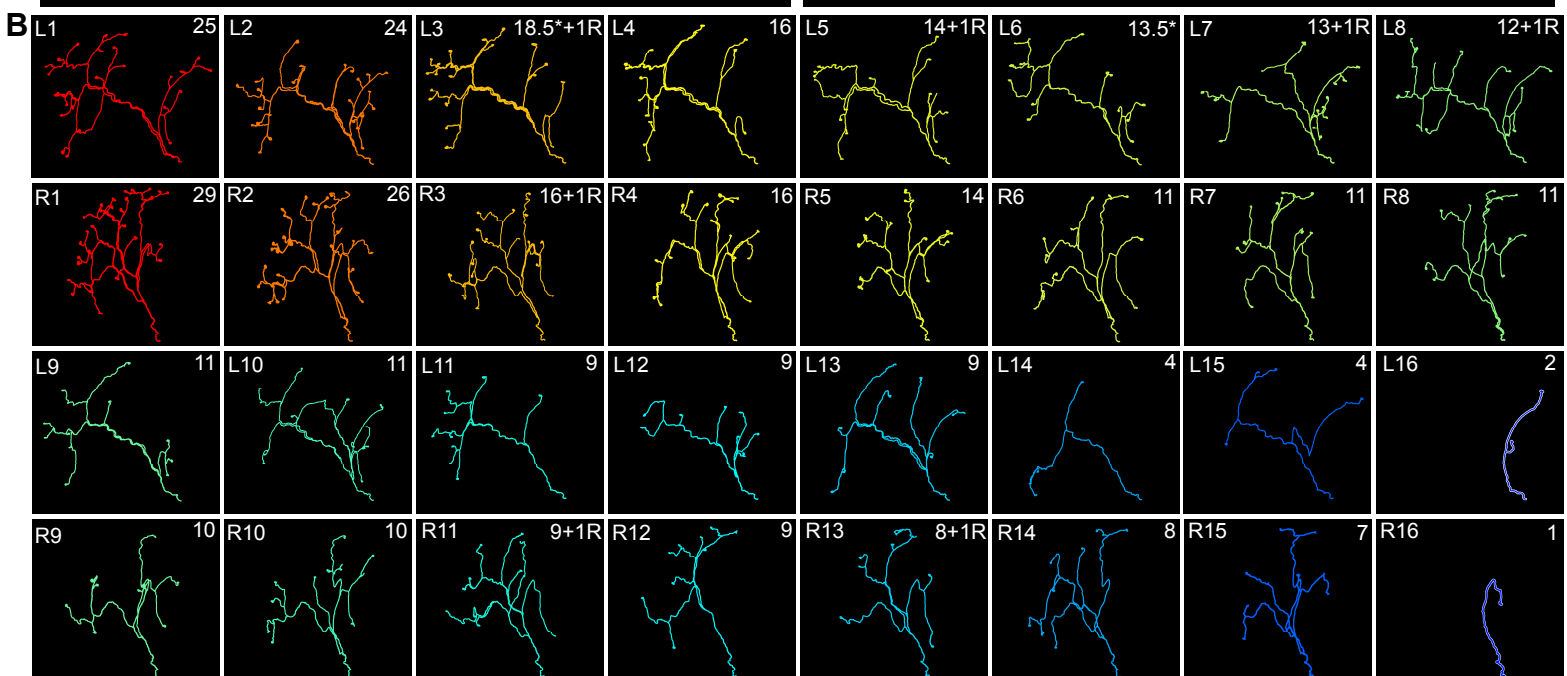

Supplement: pbio.1000032.sg001.pdf [file pbio.1000032.sg001.pdf]

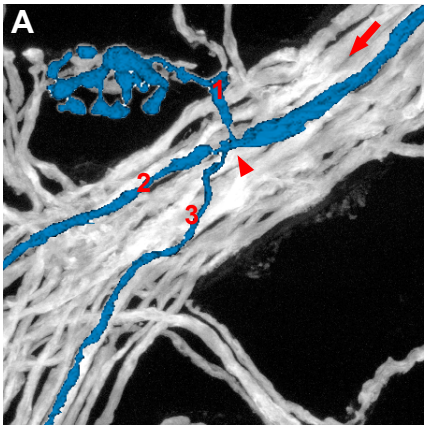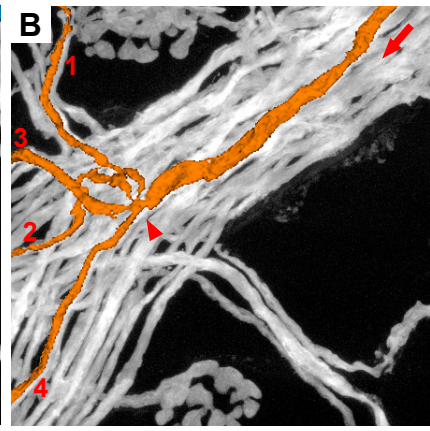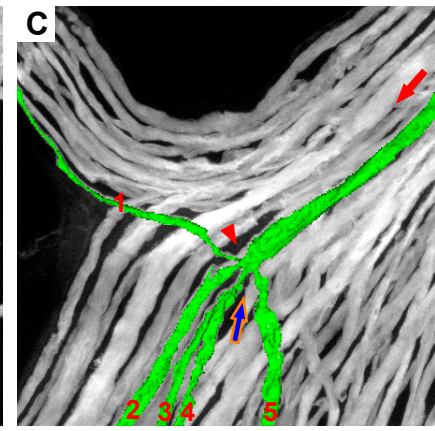

Supplement: pbio.1000032.sg002.pdf [file pbio.1000032.sg002.pdf]

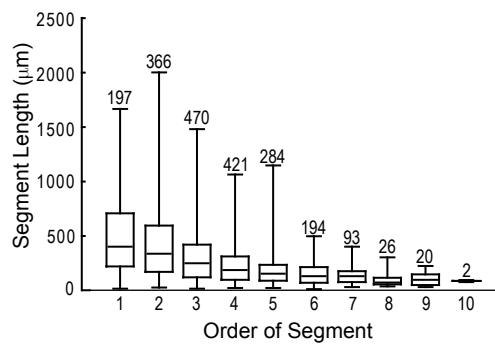

Supplement: pbio.1000032.sg003.pdf [file pbio.1000032.sg003.pdf]

**M4R**  
200µm

Rostral

Medial

Lateral

Caudal

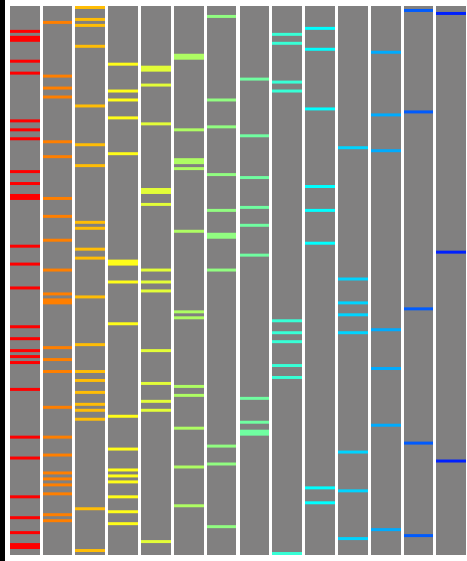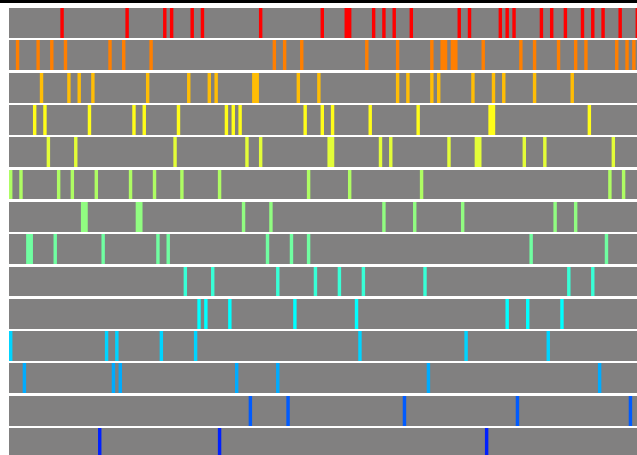

Supplement: pbio.1000032.sg004.pdf [file pbio.1000032.sg004.pdf]

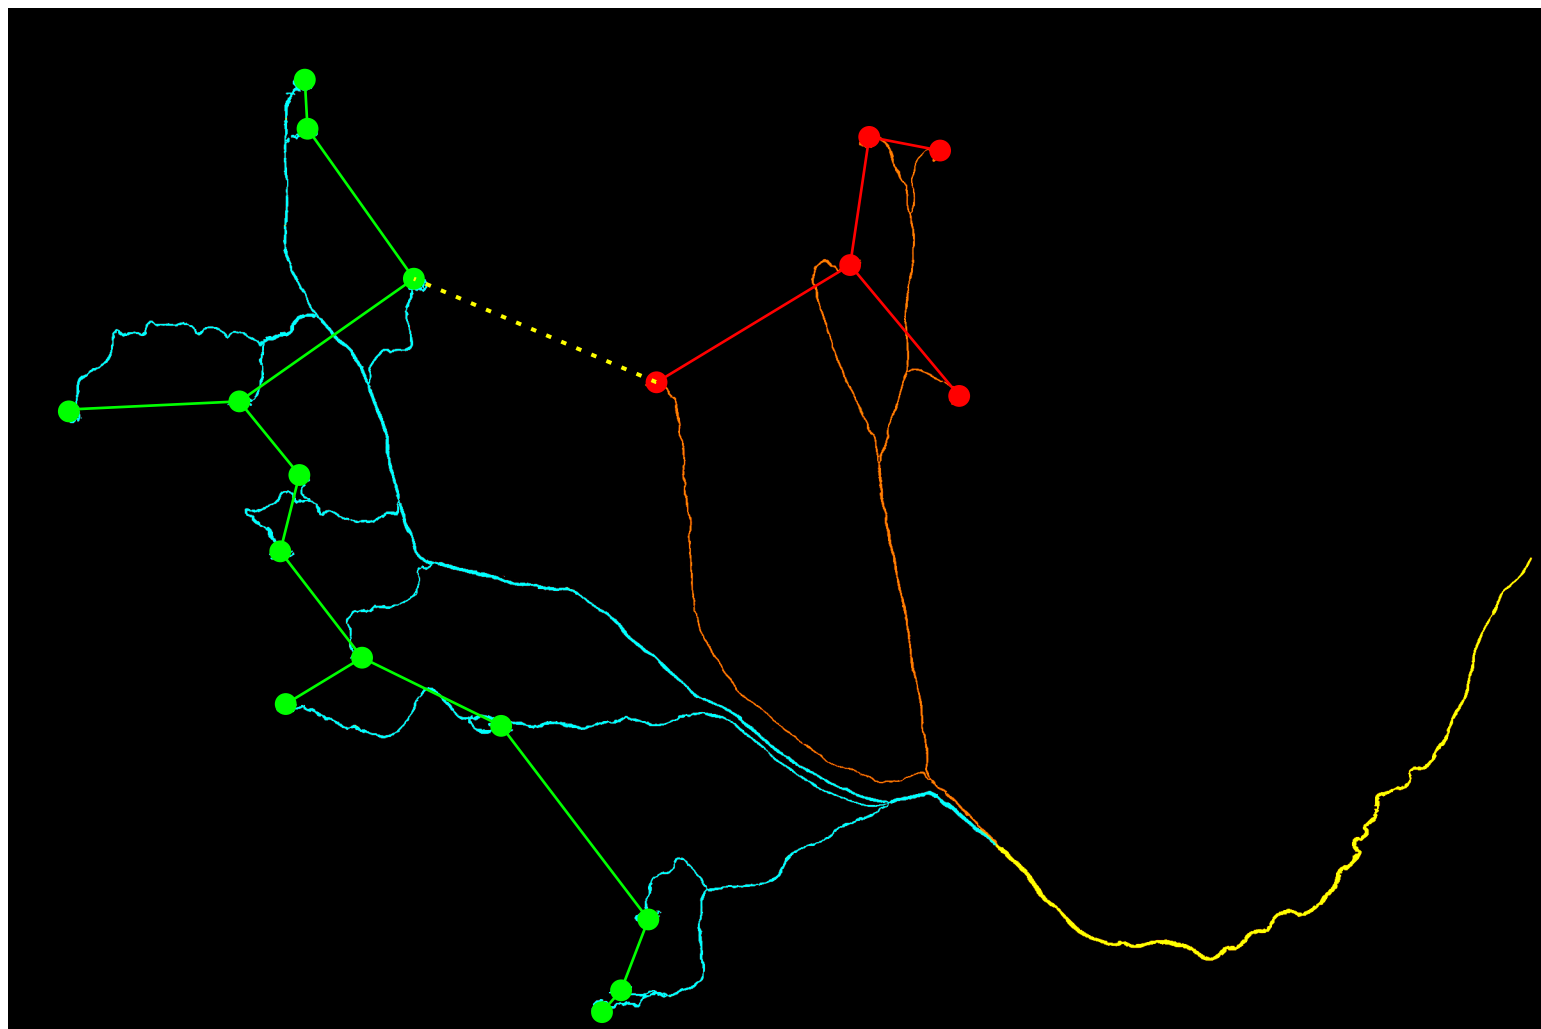

Supplement: pbio.1000032.sg005.pdf [file pbio.1000032.sg005.pdf]

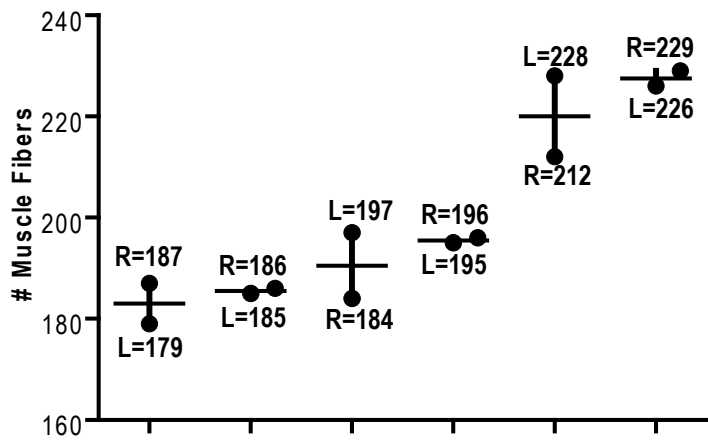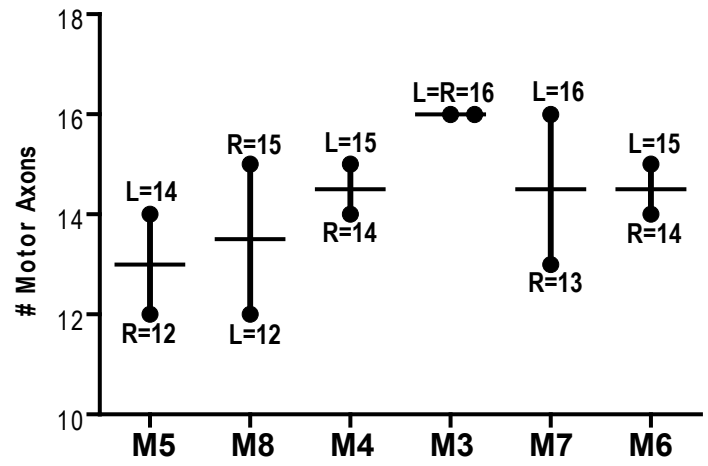

Supplement: pbio.1000032.sg006.pdf [file pbio.1000032.sg006.pdf]
